# Supplementary material
Source: Springer Nature journal article supplement (https://www.springermedizin.de/resource/supplementary/13256_2008_1266_MOESM4_ESM.pdf/9647372)

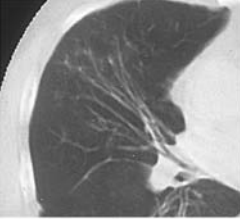

Supplement: MOESM4 [file 9647372]
